# Supplementary material
Source: Springer Nature journal article supplement (https://www.springermedizin.de/resource/supplementary/13099_2012_62_MOESM8_ESM.pdf/9665508)

**A**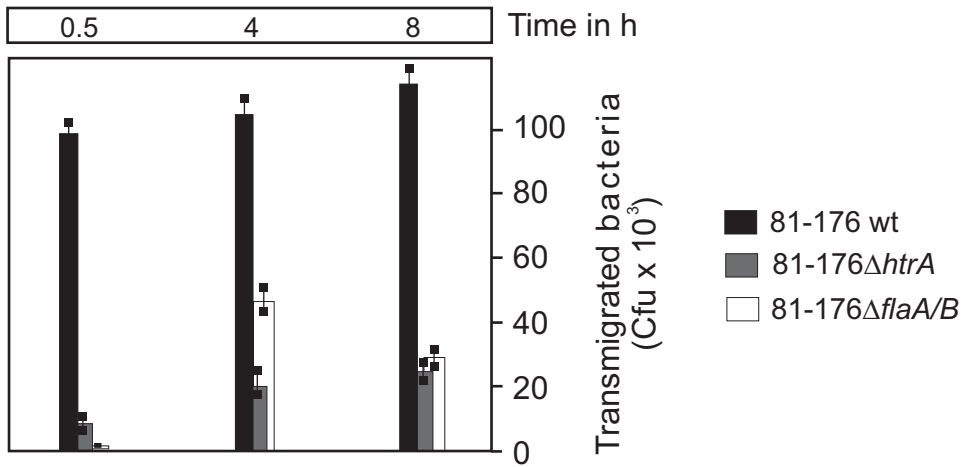**B**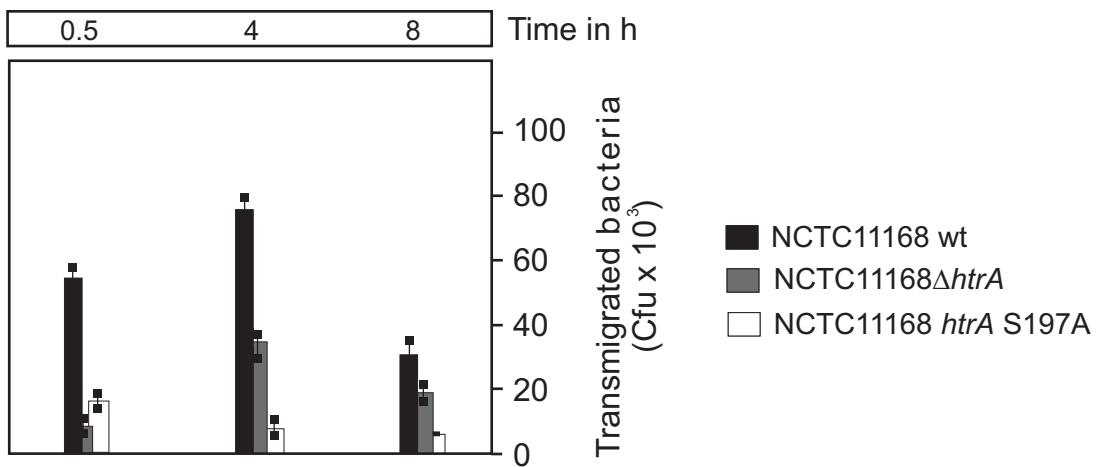**C**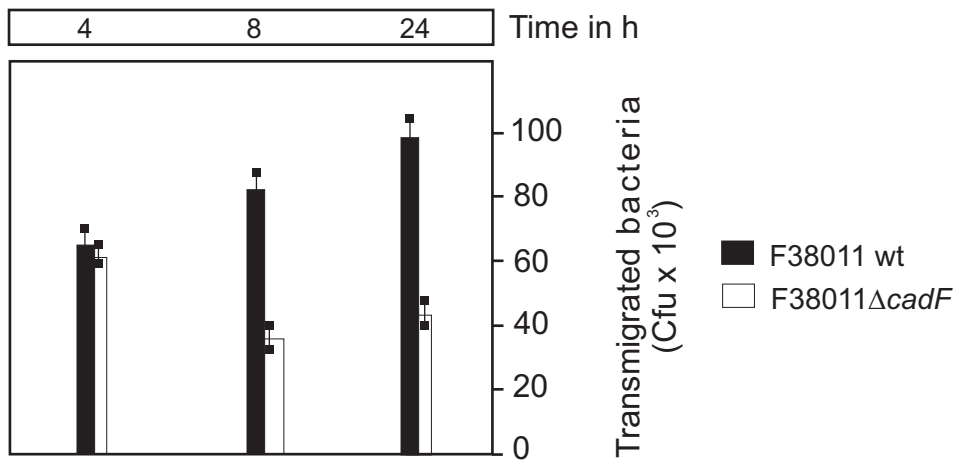

Supplement: MOESM8 [file 9665508]
